# Supplementary material for: Identification of nonsense-mediated mRNA decay pathway as a critical regulator of p53 isoform β
Source: PubMed Central journal article supplement (PMC5727530; doi:10.1038/s41598-017-17283-4), 2017-12-13

# Identification of nonsense-mediated mRNA decay pathway as a critical regulator of p53 isoform $\beta$

Lauren E. Cowen and Yi Tang\*

Department of Regenerative and Cancer Cell Biology,

Albany Medical College

47 New Scotland Ave. Albany, NY 12208

## **\*Corresponding Author:**

Yi Tang

Department of Regenerative and Cancer Cell Biology,

Albany Medical College,

47 New Scotland Ave.

Albany, NY 12208,

[tangy@amc.edu](mailto:tangy@amc.edu)

## Supplementary Figure Legends:

### Supplementary Figure 1:

**(a)** Assessment of the NMD activities in an independent HCT116 *SMG7*-null clone #2 via the NMD luciferase reporter assay<sup>35</sup>, (n=6). **(b)** qPCR analysis of p53 $\beta$  mRNA expression in the HCT116 *SMG7*-null clone #2, (n=4). **(c)** Nested semi-quantitative PCR<sup>36</sup> for full length  $\Delta$ 133p53 isoforms in HCT116 wild type and *SMG7*-null clone #1. **(d)** qPCR analysis of  $\Delta$ 133 p53 $\beta$  expression using nested PCR product specific to  $\Delta$ 133 p53 isoforms<sup>36</sup> **(c)** as a template, (n=2).

### Supplementary Figure 2:

Following transfection with the p53 $\beta$  and p53 $\gamma$  Renilla constructs, DNA fragments amplified by RT-PCR using primers P1 and P2 (shown in Figure 2a) were DNA sequenced (GeneWiz, Supplementary Table 1) for confirmation of appropriate splicing of p53. Regions surrounding canonical splice sites (Junctions between intron i9/exon 10 and exon 10/exon 11) are outlined.

### Supplementary Table 1:

Summary of siRNA sequences and source for all siRNAs used in the study. All siRNAs purchased through Sigma.

### Supplementary Table 2:

Summary of primer sequences, and source for all PCR performed in this study. All primers purchased through Invitrogen.

### Supplementary Table 1:

| siRNA         | Sequence                      | Reference | Company |
|---------------|-------------------------------|-----------|---------|
| UPF1 siRNA #1 | GAUGCAGUUC CGCUCCACC [dt][dt] | 22        | Sigma   |
| UPF1 siRNA #2 | AAGAUGCAGUUC CGCUCC [dt][dt]  | 38        | Sigma   |
| Control siRNA | Universal Mission 1           |           | Sigma   |
| p53β siRNA    | GGACCAGACCAGCUU [dt][dt]      | 18        | Sigma   |

### Supplementary Table 2:

| Primer Name                                 | PCR                  | Sequence                                                                    | Purpose                                                                           | Ref. |
|---------------------------------------------|----------------------|-----------------------------------------------------------------------------|-----------------------------------------------------------------------------------|------|
| β-actin                                     | qRT PCR              | 5'-CCAACCGCGAGAAGATGACC-3' and 5'-CGTTGGCACAGCCTGGATAGCAACG-3'              | Housekeeping gene for qRT PCR                                                     | 34   |
| p53β                                        | qRT PCR              | 5'-GAGCACTAAGCGAGCACTGCC-3' and 5'-TTGAAAGCTGGTCTGGTCCTGA-3'                | mRNA Analysis of p53β                                                             | 6    |
| ATF3                                        | qRT PCR              | 5'-GCCATTGGAGAGCTGTCTTC-3' and 5'-GGCCATCTGGAACATAAGA-3'                    | mRNA analysis of ATF3                                                             |      |
| ATF4                                        | qRT PCR              | 5'-GACGGAGCGCTTTCCTCTT-3' and 5'-TCCACAAAATGGACGCTCAC-3'                    | mRNA analysis of ATF4                                                             |      |
| ARC                                         | qRT PCR              | 5'-AGCGGGACCTGTACCAGAC-3' and 5'-GCAGGAAACGCTTGAGCTTG-3'                    | mRNA analysis of ARC                                                              |      |
| GAPDH                                       | qRT PCR              | 5'-ACAGTTGCCATGTAGACC-3' and 5'-TTTTTGGTTGAGCACAGG-3'                       | Housekeeping gene for PCR                                                         |      |
| P53 isoforms                                | Nested PCR           | See Publication                                                             | Semi-quantitative PCR                                                             | 36   |
| P53 isoforms                                | Stand. PCR           | F:(Ex. 9) 5'-GAGCACTAAGCGAGCACTGCC-3', R:(Ex. 10) 5'-CATCTCGAAGCGCTCACGC-3' | Stand. PCR for detection of p53 isoforms                                          |      |
| P53β primer                                 | Cloning              | F: 5'- GACCAGACCAGCTTTCAAAAAGA-3'                                           | For generation of p53 reporter assay: p53β                                        |      |
| p53γ primer                                 | Cloning              | F: 5'-ATGCTACTTGACTTACGATGGTGTACT-3'                                        | Cloning p53 reporter construct: p53γ                                              |      |
| p53 isoform (P2 in Figure 2A)               | Cloning              | R: 5' TCAGTCTGAGTCAGGCCCTTCTG -3'                                           | Cloning p53 reporter construct: p53β/p53γ                                         |      |
| <i>Renilla</i> luciferase (P1 in Figure 2A) | Splicing/ Sequencing | F: 5'-GATTGGGGTGCTTGTGGC-3'                                                 | Confirmation of splicing with p53 iso. R cloning primer; Sequencing of constructs |      |

# Supplementary Figure 1

**a**

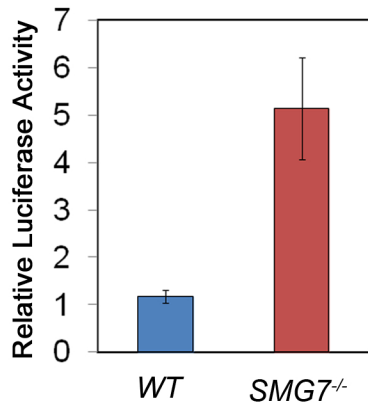

**b**

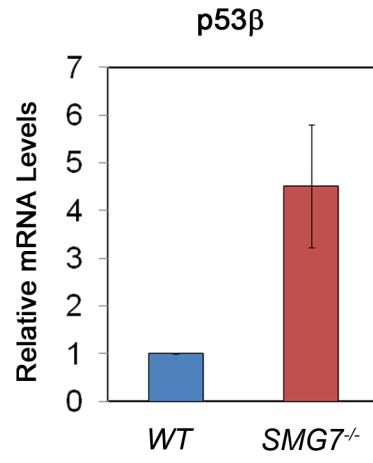

**c**

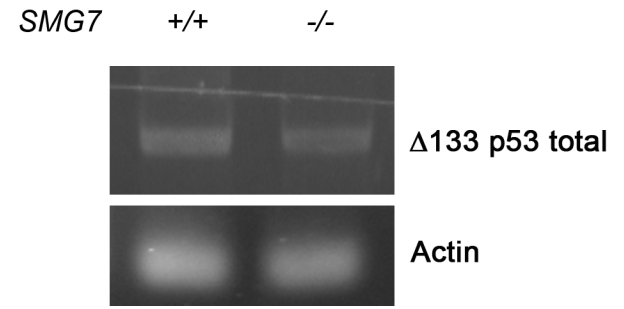

**d**

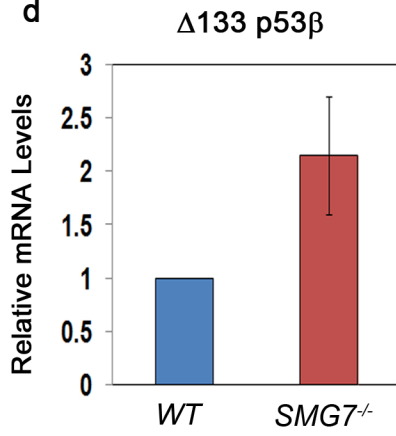

Supplementary Figure 2

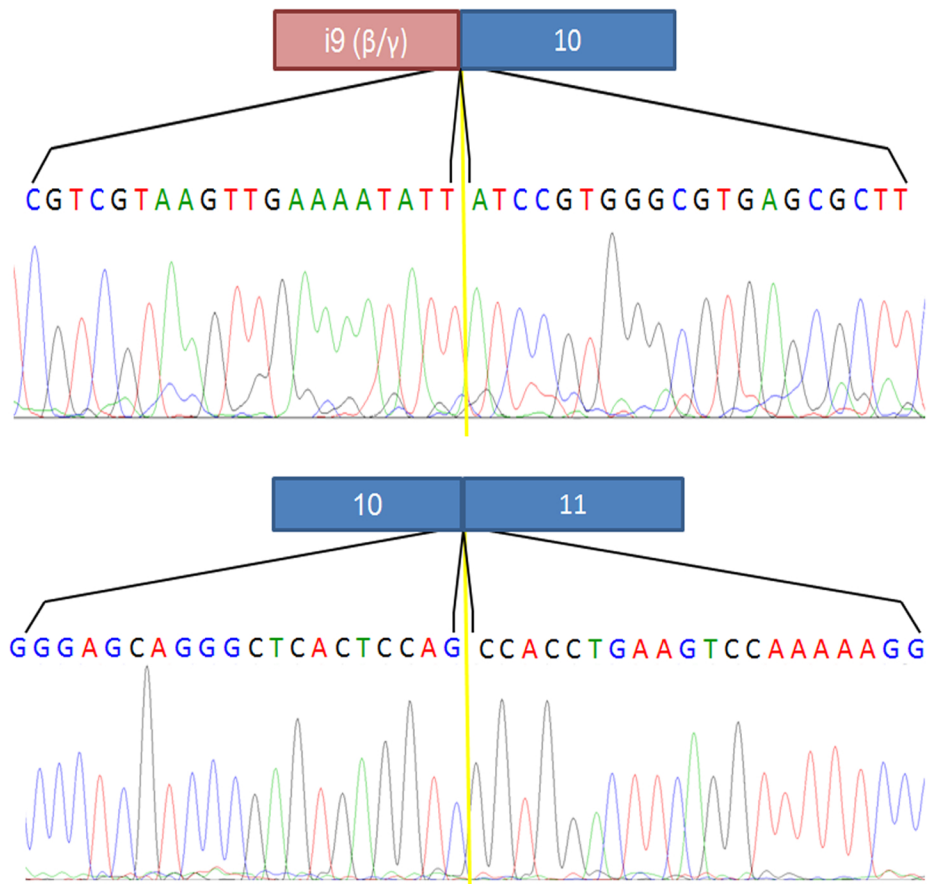

Supplement: 41598_2017_17283_MOESM1_ESM.pdf [file 41598_2017_17283_MOESM1_ESM.pdf]
